# Supplementary material for: Synergy of Mg2+and poly(aspartic acid) in additive-controlled calcium carbonate precipitation
Source: Royal Society of Chemistry journal article supplement (doi:10.1039/c5ce00452g), 2015-01-01
Supplement: c5ce00452g1.pdf [file c5ce00452g1.pdf]

## Electronic Supplementary Information

### Synergy of $\text{Mg}^{2+}$ and poly(aspartic acid) in additive-controlled calcium carbonate precipitation

Stefan L. P. Wolf,<sup>a</sup> Kathrin Jähme<sup>a</sup> and Denis Gebauer<sup>a\*</sup>

<sup>a</sup> Department of Chemistry, Physical Chemistry, University of Konstanz, Universitätsstrasse 10, 78457 Konstanz, Germany. Email: [denis.gebauer@uni-konstanz.de](mailto:denis.gebauer@uni-konstanz.de)

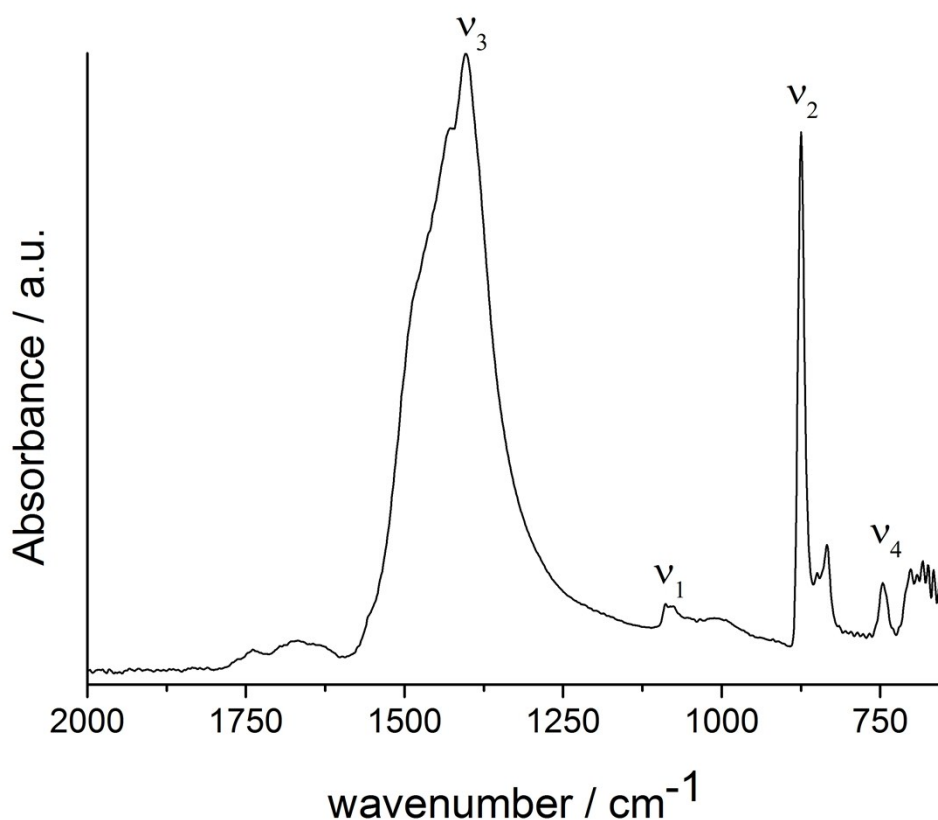

Figure S1: IR spectrum of a sample obtained with 10  $\mu\text{g/ml}$  PAsp at the end of the titration assay experiment. The bands are consistent with vaterite – ( $\nu_4 = 743 \text{ cm}^{-1}$ ).

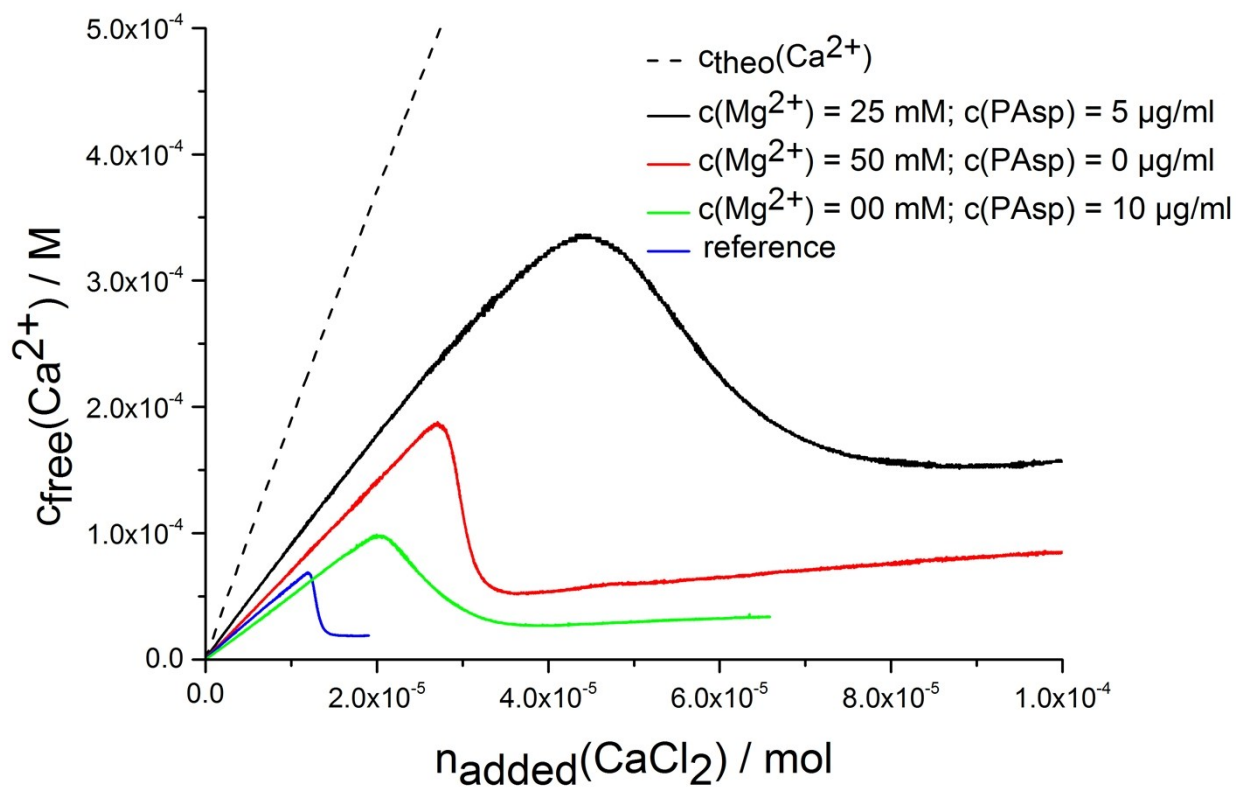

Figure S2 Development of free calcium concentration upon continuous addition of calcium solution with and without additives (as indicated) into 10 mM carbonate buffer (pH 9.75) at a rate of 10  $\mu\text{l/min}$ .

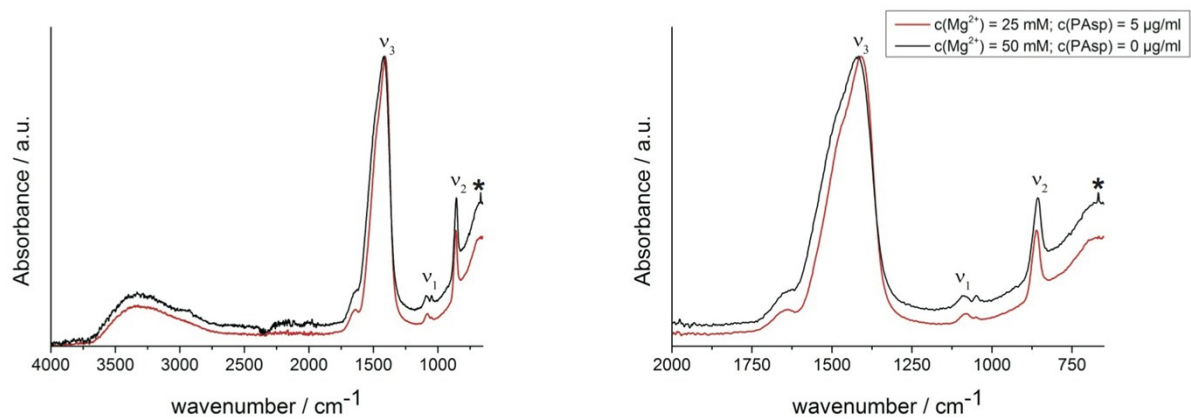

Figure S3: Complete spectral range of the IR-spectra of the ACCs formed in presence of Mg and both Mg and PAasp. The band marked by an asterisk is due to atmospheric CO<sub>2</sub> (668 cm<sup>-1</sup>; bending vibration).

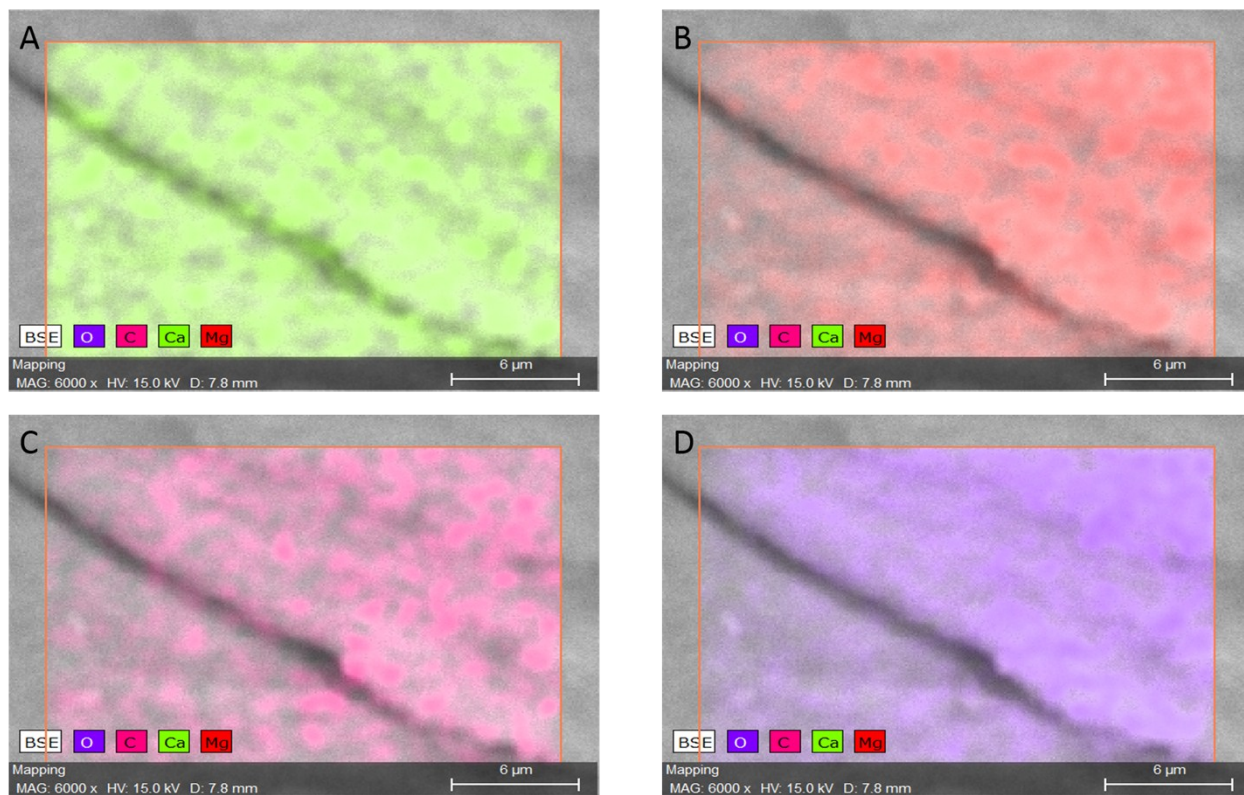

Figure S4: EDS mapping of the different Elements

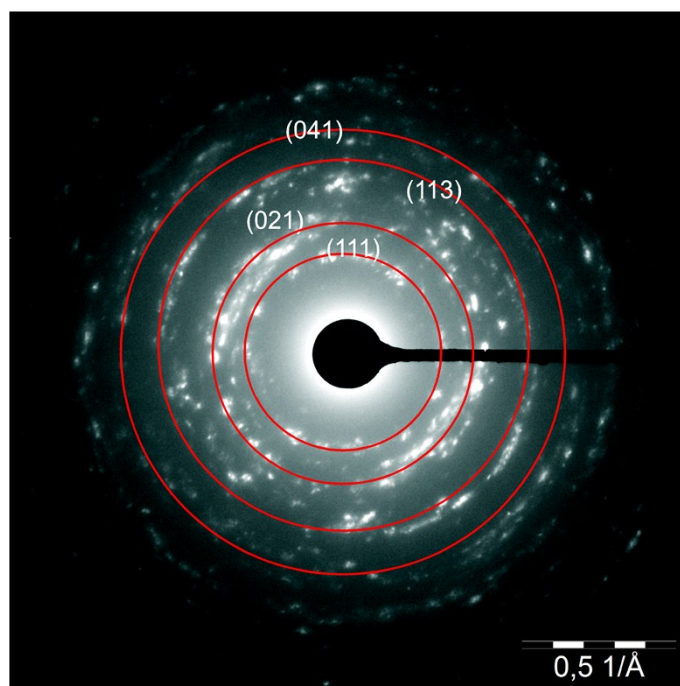

*Figure S5: Indexed ED pattern of the crystalline part. The reflexes correspond to aragonite*
